# Supplementary material for: Initial inhomogeneity-induced crazy-clock behavior in the iodate–arsenous acid reaction in a buffered medium under stirred batch conditions
Source: Royal Society of Chemistry journal article supplement (doi:10.1039/c5cp02572a), 2015-01-01
Supplement: c5cp02572a1.pdf [file c5cp02572a1.pdf]

**Electronic Supplementary Information for Initial  
Inhomogeneity Induced Crazy-Clock Behavior in the  
Iodate–Arsenous Acid Reaction in Buffered Medium  
Under Stirred Batch Conditions.**

László Valkai, György Csekő, and Attila K. Horváth\*

*Department of Inorganic Chemistry, University of Pécs, Ifjúság útja 6., H-7624 Pécs,  
Hungary*

E-mail: horvatha@gamma.ttk.pte.hu

---

\*To whom correspondence should be addressed

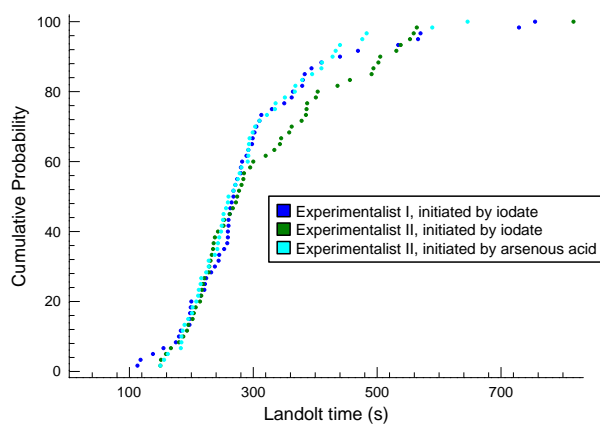

Figure S1: Cumulative probability distribution of reaction times measured by two different experimentalists and that of in case of initiating the reaction by iodate and arsenous acid. Initial conditions are as follows:  $[\text{IO}_3^-]_0 = 10.0 \text{ mM}$ ;  $[\text{H}_3\text{AsO}_3]_0 = 3.8 \text{ mM}$ ;  $\text{pH} = 2.0$ . Stirring rate was controlled at 500 rpm. The Landolt time was detected by UV-vis spectroscopy. Overall volume was set to  $2.4 \text{ cm}^3$ . Experimentalist I. (blue); Experimentalist II. (green); Experimentalist II. (cyan). The first two curves and the third curve were obtained by initiating the reaction with iodate and arsenous acid, respectively.

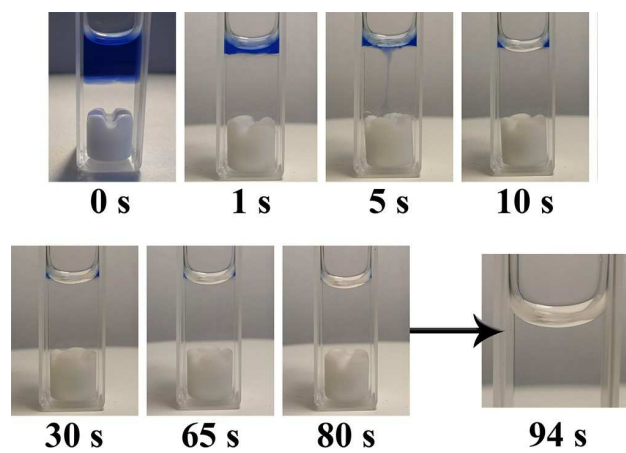

Figure S2: Demonstration of inhomogeneity and the vortex in the quartz cuvette. The ignition volume can be seen even at 80 s in the corners. The stirring rate is 500 rpm. Alkaline upper solution contains thymolphthalein indicator.

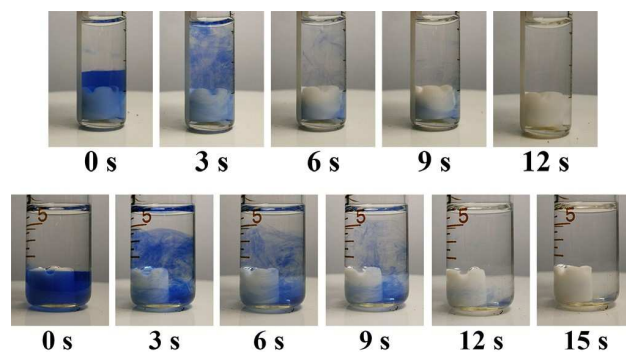

Figure S3: Demonstration of inhomogeneity in the cylindrical shaped reactors. Upper and lower pictures contain the small (inner diameter is 12 mm) and large cylinders (inner diameter is 16 mm), respectively. The stirring rate is 500 rpm. Alkaline lower solution contains thymolphthalein indicator.
